# Supplementary material for: Phylogenetic Analysis of Glucosyltransferases and Implications for the Coevolution of Mutans Streptococci with Their Mammalian Hosts
Source: PubMed Central journal article supplement (PMC3572963; doi:10.1371/journal.pone.0056305), 2013-02-14
Supplement: pone.0056305.s003.pdf [file pone.0056305.s003.pdf]

| Primer Name | Sequence (5'-3')          | Use                                                        |
|-------------|---------------------------|------------------------------------------------------------|
| GTF-001     | ACGACAGCAATTAGACTGTTGTTT  | PCR amplification of <i>gtfB</i> ( <i>S. mutans</i> )      |
| GTF-002     | CTTTTCCATATTTCTCCAAAAATAG | PCR amplification of <i>gtfB</i> ( <i>S. mutans</i> )      |
| GTF-003     | CGTTACACTGCCATCAGCAA      | PCR amplification of <i>gtfB</i> ( <i>S. macacae</i> )     |
| GTF-004     | TTCTTTTCCATACATCCTCCAAAA  | PCR amplification of <i>gtfB</i> ( <i>S. macacae</i> )     |
| GTF-005     | ATGGAGCAGTGCTTTACGA       | sequencing of <i>gtfB</i> ( <i>S. mutans</i> )             |
| GTF-006     | TGCCATCAGCAATTAATGTA      | sequencing of <i>gtfB</i> ( <i>S. mutans</i> )             |
| GTF-007     | CTTCTGAAGCTGCTGCTAAT      | sequencing of <i>gtfB</i> ( <i>S. mutans</i> )             |
| GTF-008     | GGCAGAAATCAATCCTAATG      | sequencing of <i>gtfB</i> ( <i>S. mutans</i> )             |
| GTF-009     | AAGCGTAAGTTCCATCTTCA      | sequencing of <i>gtfB</i> ( <i>S. mutans</i> )             |
| GTF-010     | CACCATCTTCACCGAGATAC      | sequencing of <i>gtfB</i> ( <i>S. mutans</i> )             |
| GTF-011     | AGCCAAAGGAAAATTTGTAAC     | sequencing of <i>gtfB</i> ( <i>S. mutans</i> )             |
| GTF-012     | AGTTAATCCGAACTCGTTCTC     | sequencing of <i>gtfB</i> ( <i>S. mutans</i> )             |
| GTF-013     | AAAGCATAGCCGTTTTGG        | sequencing of <i>gtfB</i> ( <i>S. mutans</i> )             |
| GTF-014     | AAATGGAGCAGTGCTTTAC       | sequencing of <i>gtfB</i> ( <i>S. mutans</i> )             |
| GTF-015     | TAGTACGAACTTTGCCGT        | sequencing of <i>gtfB</i> ( <i>S. troglodytae</i> )        |
| GTF-016     | ATCTTTCTTTCCGGTTTGATT     | sequencing of <i>gtfB</i> ( <i>S. troglodytae</i> )        |
| GTF-017     | TATTTCTTCTCTGTAGCCAG      | sequencing of <i>gtfB</i> ( <i>S. troglodytae</i> )        |
| GTF-018     | TCATAACGATCCGTAAAGG       | sequencing of <i>gtfB</i> ( <i>S. troglodytae</i> )        |
| GTF-019     | AATGTGGATAAGTTTGCGG       | sequencing of <i>gtfB</i> ( <i>S. troglodytae</i> )        |
| GTF-020     | GGCGTCACTTTAATAATGGT      | sequencing of <i>gtfB</i> ( <i>S. troglodytae</i> )        |
| GTF-021     | GTAATGATTTCAGAATTGCCA     | sequencing of <i>gtfB</i> ( <i>S. troglodytae</i> )        |
| GTF-022     | CTCACTGTTCCAAGCTGA        | sequencing of <i>gtfB</i> ( <i>S. troglodytae</i> )        |
| GTF-023     | AGCGAAAAACCGTTTGAT        | sequencing of <i>gtfB</i> ( <i>S. troglodytae</i> )        |
| GTF-024     | CAGAGACAAACAACAAGCAA      | sequencing of <i>gtfB</i> ( <i>S. macacae</i> )            |
| GTF-025     | GTTTTTCGCTTTCACTGTTC      | sequencing of <i>gtfB</i> ( <i>S. macacae</i> )            |
| GTF-026     | TTAATGGTAAGGCTCTGCAT      | sequencing of <i>gtfB</i> ( <i>S. macacae</i> )            |
| GTF-027     | AGCATCTACACGAATGGAGT      | sequencing of <i>gtfB</i> ( <i>S. macacae</i> )            |
| GTF-028     | GAACAGTGAAAGCGAAAAAC      | sequencing of <i>gtfB</i> ( <i>S. macacae</i> )            |
| GTF-029     | GACGACTTGTTCAATTTTCGT     | sequencing of <i>gtfB</i> ( <i>S. macacae</i> )            |
| GTF-030     | GCATGAATCCTTTGATCACT      | sequencing of <i>gtfB</i> ( <i>S. macacae</i> )            |
| GTF-031     | TCTGCCGTACCGTATTTATT      | sequencing of <i>gtfB</i> ( <i>S. macacae</i> )            |
| GTF-032     | GCGAGTGAACTCCATCTAC       | sequencing of <i>gtfB</i> ( <i>S. macacae</i> )            |
| GTF-033     | ACCAGTCACCATGTAACCAT      | sequencing of <i>gtfB</i> ( <i>S. macacae</i> )            |
| GTF-034     | TCAGGAAAAGATCAACAAGC      | sequencing of <i>gtfB</i> ( <i>S. macacae</i> )            |
| GTF-035     | TAATAGCTGATACGGCCTTG      | sequencing of <i>gtfB</i> ( <i>S. macacae</i> )            |
| GTF-036     | AAGAATCTGGCAATATGCAC      | sequencing of <i>gtfB</i> ( <i>S. macacae</i> )            |
| GTF-037     | TACCTTACCAGCTTCATCGT      | sequencing of <i>gtfB</i> ( <i>S. macacae</i> )            |
| GTF-038     | AGGGCGTTTCTAGGGTTAGG      | PCR amplification of <i>gtfC</i> ( <i>S. mutans</i> )      |
| GTF-039     | CAAGGCATGCGTCTCTTCTT      | PCR amplification of <i>gtfC</i> ( <i>S. mutans</i> )      |
| GTF-040     | GCCGTATCAGGATGACAATCA     | PCR amplification of <i>gtfC</i> ( <i>S. macacae</i> )     |
| GTF-041     | CAAGACCAAAGTCTGCCTCT      | PCR amplification of <i>gtfC</i> ( <i>S. macacae</i> )     |
| GTF-042     | CGATGCTAACTCTGGAGAACG     | PCR amplification of <i>gtfC</i> ( <i>S. troglodytae</i> ) |
| GTF-043     | TTTTAGTTTGGCTCTGCCTTTTT   | PCR amplification of <i>gtfC</i> ( <i>S. troglodytae</i> ) |
| GTF-044     | TTCTGTTGACTGTGTCCATG      | sequencing of <i>gtfC</i> ( <i>S. mutans</i> )             |
| GTF-045     | TGGGAAAACCTTCTTCTTTG      | sequencing of <i>gtfC</i> ( <i>S. mutans</i> )             |
| GTF-046     | CTTCACAGGCTAATTCCAAC      | sequencing of <i>gtfC</i> ( <i>S. mutans</i> )             |
| GTF-047     | GAAGGCTTTTCGAGATTTACA     | sequencing of <i>gtfC</i> ( <i>S. mutans</i> )             |
| GTF-048     | TAGCTTGGTTACCACTCGTT      | sequencing of <i>gtfC</i> ( <i>S. mutans</i> )             |

|         |                           |                                                             |
|---------|---------------------------|-------------------------------------------------------------|
| GTF-049 | ATCAAAGTAACGCAGCTTTC      | sequencing of <i>gtfC</i> ( <i>S. mutans</i> )              |
| GTF-050 | CGTCGTTATGAAAATGGTTAC     | sequencing of <i>gtfC</i> ( <i>S. mutans</i> )              |
| GTF-051 | TTTTTCATCAAAGTAAACACGTC   | sequencing of <i>gtfC</i> ( <i>S. mutans</i> )              |
| GTF-052 | TCTCTTTCAGGTGGATTTGT      | sequencing of <i>gtfC</i> ( <i>S. macacae</i> )             |
| GTF-053 | GCCACCAGGACATAAGAATA      | sequencing of <i>gtfC</i> ( <i>S. macacae</i> )             |
| GTF-054 | ACAAAGAAGATGGCACTGTT      | sequencing of <i>gtfC</i> ( <i>S. macacae</i> )             |
| GTF-055 | TCTTTCCAAAATTCATGAGG      | sequencing of <i>gtfC</i> ( <i>S. macacae</i> )             |
| GTF-056 | CAAGTATGGGAGGCTATGAG      | sequencing of <i>gtfC</i> ( <i>S. macacae</i> )             |
| GTF-057 | CGTATTTTATCCGTGCTTTC      | sequencing of <i>gtfC</i> ( <i>S. macacae</i> )             |
| GTF-058 | CTGAAATCAATCCCAATGTT      | sequencing of <i>gtfC</i> ( <i>S. macacae</i> )             |
| GTF-059 | CAAATCTTGAAATTCGAG        | sequencing of <i>gtfC</i> ( <i>S. macacae</i> )             |
| GTF-060 | CTCGTTTATCAGGAGTTGCT      | sequencing of <i>gtfC</i> ( <i>S. macacae</i> )             |
| GTF-061 | CCGTTGAAATCTGTTTCCTA      | sequencing of <i>gtfC</i> ( <i>S. macacae</i> )             |
| GTF-062 | AGATGGGACTTTCCTTGATT      | sequencing of <i>gtfC</i> ( <i>S. macacae</i> )             |
| GTF-063 | TGACAGTCGTTAAACCAACA      | sequencing of <i>gtfC</i> ( <i>S. macacae</i> )             |
| GTF-064 | ATGACGGGAAAGGCTATACT      | sequencing of <i>gtfC</i> ( <i>S. macacae</i> )             |
| GTF-065 | TAGTATTTGACACGGCCTTT      | sequencing of <i>gtfC</i> ( <i>S. macacae</i> )             |
| GTF-066 | TCCAAGCTAAAGGACAGTTT      | sequencing of <i>gtfC</i> ( <i>S. macacae</i> )             |
| GTF-067 | CATGCTAATCCAACACTCCG      | sequencing of <i>gtfC</i> ( <i>S. troglodytae</i> )         |
| GTF-068 | GGAGCAGGCTATGTCTTAAA      | sequencing of <i>gtfC</i> ( <i>S. troglodytae</i> )         |
| GTF-069 | GACCGCCTGAAACATACTT       | sequencing of <i>gtfC</i> ( <i>S. troglodytae</i> )         |
| GTF-070 | ACCAGTGACCATATAGCCG       | sequencing of <i>gtfC</i> ( <i>S. troglodytae</i> )         |
| GTF-071 | ATGCAGCTTTCATCAGC         | sequencing of <i>gtfC</i> ( <i>S. troglodytae</i> )         |
| GTF-072 | CCAAGCTTTCGCCACTAAAA      | sequencing <i>gtfB</i> and <i>gtfC</i> ( <i>S. mutans</i> ) |
| GTF-073 | GAATCAAAGTTAGCATCCG       | sequencing <i>gtfB</i> and <i>gtfC</i> ( <i>S. mutans</i> ) |
| GTF-074 | GCC ATT ACC TTA ATG CCC T | sequencing <i>gtfB</i> and <i>gtfC</i> ( <i>S. mutans</i> ) |
| GTF-075 | GATCGTCTTATGAGCCATGT      | sequencing <i>gtfB</i> and <i>gtfC</i> ( <i>S. mutans</i> ) |
| GTF-076 | AATGGGACAAATATTTTAGGG     | sequencing <i>gtfB</i> and <i>gtfC</i> ( <i>S. mutans</i> ) |
| GTF-077 | TTATTTTACGACGGTTGTTGT     | PCR amplification of <i>gtfD</i> ( <i>S. mutans</i> )       |
| GTF-078 | AAAGCCTGACTGGAAGCAGT      | PCR amplification of <i>gtfD</i> ( <i>S. mutans</i> )       |
| GTF-079 | TTTTACGCGAGCCTTAATAGA     | PCR amplification of <i>gtfD</i> ( <i>S. troglodytae</i> )  |
| GTF-080 | AGAAGTATCATTTCCCTGAGC     | PCR amplification of <i>gtfD</i> ( <i>S. troglodytae</i> )  |
| GTF-081 | CATGGCCTTAGCCAGTTTATT     | PCR amplification of <i>gtfD</i> ( <i>S. macacae</i> )      |
| GTF-082 | CAGCGGCTGTTTGACTTGA       | PCR amplification of <i>gtfD</i> ( <i>S. macacae</i> )      |
| GTF-083 | GCAAACGTTGCTGATAACAAG     | sequencing of <i>gtfD</i> ( <i>S. mutans</i> )              |
| GTF-084 | GTTTGCTGCGTTTGAGAAAT      | sequencing of <i>gtfD</i> ( <i>S. mutans</i> )              |
| GTF-085 | TAATGTCTTGGTGGCCAGAT      | sequencing of <i>gtfD</i> ( <i>S. mutans</i> )              |
| GTF-086 | GCGATAGGCGCAGTTTATTA      | sequencing of <i>gtfD</i> ( <i>S. mutans</i> )              |
| GTF-087 | AAAGCCCATTATGGTGTTGA      | sequencing of <i>gtfD</i> ( <i>S. mutans</i> )              |
| GTF-088 | AATGACAGCCATTCCTTG TG     | sequencing of <i>gtfD</i> ( <i>S. mutans</i> )              |
| GTF-089 | CGGTGGTCAAGACATGAAG       | sequencing of <i>gtfD</i> ( <i>S. mutans</i> )              |
| GTF-090 | TCTTGCTGAGAACCGTATTTG     | sequencing of <i>gtfD</i> ( <i>S. mutans</i> )              |
| GTF-091 | TCAAATCTTGGGGTGCTACT      | sequencing of <i>gtfD</i> ( <i>S. mutans</i> )              |
| GTF-092 | AGATGCTGCAAGCCATAAAC      | sequencing of <i>gtfD</i> ( <i>S. mutans</i> )              |
| GTF-093 | TTTGTTAATGATGGCAATGG      | sequencing of <i>gtfD</i> ( <i>S. mutans</i> )              |
| GTF-094 | TCGCTTGCAAATAGAGCTT       | sequencing of <i>gtfD</i> ( <i>S. mutans</i> )              |
| GTF-095 | TATTTCTTGCCAATTCAGG       | sequencing of <i>gtfD</i> ( <i>S. mutans</i> )              |
| GTF-096 | CCATTATCGGTCGGTTTGT       | sequencing of <i>gtfD</i> ( <i>S. mutans</i> )              |
| GTF-097 | TGATGACAAAACGGTGACAG      | sequencing of <i>gtfD</i> ( <i>S. troglodytae</i> )         |

|         |                       |                                                     |
|---------|-----------------------|-----------------------------------------------------|
| GTF-098 | TTGGCTGCGTTTTAACAAA   | sequencing of <i>gtfD</i> ( <i>S. troglodytae</i> ) |
| GTF-099 | ACTGGTAATGACAGCCATACC | sequencing of <i>gtfD</i> ( <i>S. troglodytae</i> ) |
| GTF-100 | GCGTTTTGACTTCTGTTTCGT | sequencing of <i>gtfD</i> ( <i>S. troglodytae</i> ) |
| GTF-101 | CAATCCGCAATGACTTGAAT  | sequencing of <i>gtfD</i> ( <i>S. troglodytae</i> ) |
| GTF-102 | CTTTGGTCAAGATGGCAAGC  | sequencing of <i>gtfD</i> ( <i>S. troglodytae</i> ) |
| GTF-103 | TAATGGCGACAGGTATTTCC  | sequencing of <i>gtfD</i> ( <i>S. troglodytae</i> ) |
| GTF-104 | AAAGGCAGTTCAGCACAGGT  | sequencing of <i>gtfD</i> ( <i>S. macacae</i> )     |
| GTF-105 | TCGCCAGCTGAAGTATCAGA  | sequencing of <i>gtfD</i> ( <i>S. macacae</i> )     |
| GTF-106 | TGCAGCTCAAACGTCCAAG   | sequencing of <i>gtfD</i> ( <i>S. macacae</i> )     |
| GTF-107 | CGCTGGCTGTTTTTACCTTC  | sequencing of <i>gtfD</i> ( <i>S. macacae</i> )     |
| GTF-108 | AGGTGCACAGCTCCCTATTG  | sequencing of <i>gtfD</i> ( <i>S. macacae</i> )     |
| GTF-109 | GCCGCCCCATATTAACACTAC | sequencing of <i>gtfD</i> ( <i>S. macacae</i> )     |
| GTF-110 | CGCTATGGTACAGGGGCTAA  | sequencing of <i>gtfD</i> ( <i>S. macacae</i> )     |
| GTF-111 | GATCTGATCTGGCACCCAGT  | sequencing of <i>gtfD</i> ( <i>S. macacae</i> )     |
| GTF-112 | GGCACCGCAATACGTATCAT  | sequencing of <i>gtfD</i> ( <i>S. macacae</i> )     |
| GTF-113 | AACGCCATTTTGCAAGAAATA | sequencing of <i>gtfD</i> ( <i>S. macacae</i> )     |
| GTF-114 | TGATGATGGCAAGGGAATTA  | sequencing of <i>gtfD</i> ( <i>S. macacae</i> )     |
| GTF-115 | CTGCCTTTCACTTGCTTTCC  | sequencing of <i>gtfD</i> ( <i>S. macacae</i> )     |
| GTF-116 | TTTTTGCCACAGACAGTCAA  | sequencing of <i>gtfD</i> ( <i>S. macacae</i> )     |
| GTF-117 | GCTTCGTTGCCTTACTGCTAA | sequencing of <i>gtfD</i> ( <i>S. macacae</i> )     |
