# Supplementary material for: Phylogenetic Analysis of Glucosyltransferases and Implications for the Coevolution of Mutans Streptococci with Their Mammalian Hosts
Source: PubMed Central journal article supplement (PMC3572963; doi:10.1371/journal.pone.0056305), 2013-02-14
Supplement: pone.0056305.s004.pdf [file pone.0056305.s004.pdf]

| GI Accession | Locus Accession | Definition                           | Organism                                       | Strain              | Gene Name  | Origin, site           | Protein Length | Type of Glucan |
|--------------|-----------------|--------------------------------------|------------------------------------------------|---------------------|------------|------------------------|----------------|----------------|
| 335358117    | ZP_08549987.1   | glycosyl hydrolase family 70 protein | Lactobacillus animalis                         | KCTC 3501           |            | Baboon, oral           | 1651           | N/F            |
| 335358118    | ZP_08549988.1   | glycosyl hydrolase family 70 protein | Lactobacillus animalis                         | KCTC 3501           |            | Baboon, oral           | 1573           | N/F            |
| 51574164     | AAU08008.1      | glucansucrase                        | Lactobacillus fermentum                        | Kq3                 | gtfKq3     | N/F                    | 1463           | Dextran        |
| 301128693    | CB119544.1      | glucosyltransferase (dextransucrase) | Lactobacillus hilgardii                        | TMW 1.828           |            | Water kefir            | 1448           | Dextran        |
| 51574161     | AAU08006.1      | glucansucrase                        | Lactobacillus parabuchneri                     | 33                  | gtf33      | N/F                    | 1561           | Dextran        |
| 51574154     | AAU08001.1      | glucansucrase                        | Lactobacillus reuteri                          | 180                 | gtf180     | N/F                    | 1772           | Dextran        |
| 62736384     | AAx97502.1      | glucansucrase                        | Lactobacillus reuteri                          | ATCC 55730          | gtfO       | Human, breast milk     | 1781           | Reuteran       |
| 51574173     | AAU08015.1      | glucansucrase                        | Lactobacillus reuteri                          | 121                 | gtfA       | Pig, intestine         | 1781           | Reuteran       |
| 145666440    | ABP88726.1      | dextransucrase                       | Lactobacillus reuteri                          | TMW1.106            | gtf106A    | Sourdough              | 1782           | N/F            |
| 51574158     | AAU08004.1      | glucansucrase                        | Lactobacillus reuteri                          | ML1                 | gtfML1     | Mouse                  | 1772           | Mutan          |
| 51574168     | AAU08011.1      | glucansucrase                        | Lactobacillus sakei                            | Kq15                | gtfKq15    | N/F                    | 1595           | Dextran        |
| 335350707    | EGM52203.1      | dextransucrase                       | Lactobacillus salivarius                       | GJ-24               |            | Human, intestine       | 1786           | N/F            |
| 164454297    | BAF96719.1      | dextransucrase                       | Leuconostoc citreum                            | HJ-P4 (KACC 91035)  | LcDS       | Kimchi                 | 1477           | Dextran        |
| 296470401    | ACY92456.2      | dextransucrase                       | Leuconostoc citreum                            | B/110-1-2           | dsrF       | Sugar-cane juice       | 1527           | Dextran        |
| 170016491    | YP_001727410.1  | glucosyltransferase                  | Leuconostoc citreum                            | KM20                |            | Kimchi Baechu          | 1505           | N/F            |
| 170017743    | YP_001728662.1  | dextransucrase                       | Leuconostoc citreum                            | KM20                |            | Kimchi Baechu          | 1495           | N/F            |
| 330717998    | ZP_08312598.1   | alternansucrase                      | Leuconostoc fallax                             | KCTC 3537           |            | Sauerkraut             | 1874           | N/F            |
| 330718209    | ZP_08312809.1   | glycosyl hydrolase family 70 protein | Leuconostoc fallax                             | KCTC 3537           |            | Sauerkraut             | 1543           | N/F            |
| 300173313    | YP_003772479.1  | dextransucrase                       | Leuconostoc gasicomitatum                      | LMG 18811           | dsrA       | Marinated broiler meat | 1526           | N/F            |
| 333398048    | ZP_08479861.1   | dextransucrase                       | Leuconostoc gelidum                            | KCTC 3527           |            | Kimchi                 | 1528           | N/F            |
| 333398151    | ZP_08479964.1   | dextransucrase                       | Leuconostoc gelidum                            | KCTC 3527           |            | Kimchi                 | 1422           | N/F            |
| 296112122    | YP_003622504.1  | glucosyltransferase-S                | Leuconostoc kimchii                            | IMSNU 11154         |            | Kimchi                 | 1549           | N/F            |
| 296111841    | YP_003622223.1  | glucosyltransferase-S                | Leuconostoc kimchii                            | IMSNU 11154         |            | Kimchi                 | 1455           | N/F            |
| 251825496    | ACT20911.1      | glucansucrase                        | Leuconostoc lactis                             | EG001               |            | Kimchi                 | 1500           | N/F            |
| 45934744     | AAS79426.1      | dextransucrase                       | Leuconostoc mesenteroides                      | IBT-PQ              | dsrP       | Pulque                 | 1454           | Dextran        |
| 10862851     | CAB65910.2      | alternansucrase                      | Leuconostoc mesenteroides                      | NRRL B-1355         | asr        | Soil                   | 2057           | Alternan       |
| 29465860     | AAN38835.1      | dextransucrase                       | Leuconostoc mesenteroides                      | NRRL B-1501         | dsrR       | Sugar-cane juice       | 1330           | N/F            |
| 11559649     | AAG38021.1      | dextransucrase                       | Leuconostoc mesenteroides                      | B-742CB             | dsrb742    | N/F                    | 1508           | Dextran        |
| 116618836    | YP_819207.1     | glycosyl hydrolase family 70 protein | Leuconostoc mesenteroides subsp. mesenteroides | ATCC 8293           |            | Fermenting olives      | 1527           | N/F            |
| 116618841    | YP_819212.1     | glycosyl hydrolase                   | Leuconostoc mesenteroides subsp. mesenteroides | ATCC 8293           |            | Fermenting olives      | 1514           | N/F            |
| 118586951    | ZP_01544383.1   | dextransucrase                       | Oenococcus oeni                                | ATCC BAA-1163       | dsrT       | Bordeaux wine          | 1100           | N/F            |
| 116490611    | YP_810155.1     | glycosyl hydrolase                   | Oenococcus oeni                                | PSU-1               |            | Wine                   | 1475           | N/F            |
| 146741366    | BAF62338.1      | glucosyltransferase-I                | Streptococcus criceti                          | GTC242 (HS-6)       | gtfI       | Hamster, oral          | 1461           | Mutan          |
| 342837857    | ZP_08711720.1   | glucosyltransferase-S2               | Streptococcus criceti                          | GTC242 (HS-6)       | gtfS2      | Hamster, oral          | 1512           | N/F            |
| 357235604    | ZP_09122947.1   | glucosyltransferase-S1               | Streptococcus criceti                          | GTC242 (HS-6)       | gtfS1      | Hamster, oral          | 1338           | N/F            |
| 357236477    | ZP_09123820.1   | glucosyltransferase-S11              | Streptococcus criceti                          | GTC242 (HS-6)       | gtfS11     | Hamster, oral          | 1393           | N/F            |
| 356885157    | EHI75357.1      | glucosyltransferase-S12              | Streptococcus criceti                          | GTC242 (HS-6)       | gtfS12     | Hamster, oral          | 1542           | N/F            |
| 167735926    | BAG07220.1      | glucosyltransferase-I                | Streptococcus dentirousetti                    | NUM1302             | gtfI       | Bat, oral cavity       | 1466           | Mutan          |
| 358350618    | BAL15792.1      | glucosyltransferase-S                | Streptococcus dentirousetti                    | NUM1302             | gtfS       | Bat, oral              | 1369           | N/F            |
| 358350620    | BAL15793.1      | glucosyltransferase-T                | Streptococcus dentirousetti                    | NUM1302             | gtfT       | Bat, oral              | 1508           | Dextran        |
| 146741368    | BAF62339.1      | glucosyltransferase-I                | Streptococcus dentisuis                        | NUM1103             | gtfI       | Pig, oral cavity       | 1466           | N/F            |
| 153652       | AAA26898.1      | glucosyltransferase-S                | Streptococcus downei                           | MFe28 (ATCC 33748)  | gtfS       | Macaque, oral          | 1365           | Dextran        |
| 121724       | P11001.1        | glucosyltransferase-I                | Streptococcus downei                           | MFe28 (ATCC 33748)  | gtfI       | Macaque, oral          | 1597           | Mutan          |
| 312865974    | ZP_07726195.1   | KxYKxGKxW signal domain protein      | Streptococcus downei                           | F0415               |            | Human, oral            | 1505           | N/F            |
| 156563506    | BAF76048.1      | glucosyltransferase                  | Streptococcus equinus                          | ATCC 33317          | gtf        | Cow, dung              | 1546           | N/F            |
| 288905256    | YP_003430478.1  | glucosyltransferase                  | Streptococcus gallolyticus                     | UCN34               | gtfA       | Human, endocarditis    | 1522           | N/F            |
| 288905258    | YP_003430480.1  | glucosyltransferase-T                | Streptococcus gallolyticus                     | UCN34               | gtfB       | Human, endocarditis    | 1412           | N/F            |
| 325978242    | YP_004287958.1  | glucosyltransferase-I                | Streptococcus gallolyticus subsp. gallolyticus | ATCC BAA-2069       | gtfB1      | Human, blood           | 1545           | N/F            |
| 157150042    | YP_001449813.1  | glucosyltransferase G                | Streptococcus gordonii                         | ATCC 35105          | gtfG       | Human, oral            | 1576           | Dextran        |
| 171779392    | ZP_02920356.1   | hypothetical protein STRINF_01237    | Streptococcus infantarius subsp. infantarius   | ATCC BAA-102        | gtfD?      | Human, faeces          | 1448           | N/F            |
| 357584985    | EHJ52188.1      | glucosyltransferase-S                | Streptococcus macacae                          | NCTC 11558          | STRMA_0560 | Macaque, oral          | 1471           | N/F            |
| 357584774    | EHJ51977.1      | glucosyltransferase-I                | Streptococcus macacae                          | NCTC 11558          | STRMA_0629 | Macaque, oral          | 1418           | N/F            |
| 357585503    | EHJ52706.1      | glucosyltransferase-SI               | Streptococcus macacae                          | NCTC 11558          | STRMA_0630 | Macaque, oral          | 1448           | N/F            |
| 24379444     | NP_721399.1     | glucosyltransferase-I                | Streptococcus mutans                           | UA159               | gtfB       | Human, oral            | 1476           | Mutan          |
| 24379445     | NP_721400.1     | glucosyltransferase-SI               | Streptococcus mutans                           | UA159               | gtfC       | Human, oral            | 1455           | Mutan, Dextran |
| 24379358     | NP_721313.1     | glucosyltransferase-S                | Streptococcus mutans                           | UA159               | gtfD       | Human, oral            | 1462           | Dextran        |
| 293365092    | ZP_06611809.1   | glucosyltransferase-S                | Streptococcus oralis                           | ATCC 35037          |            | Human, oral            | 1575           | Dextran        |
| 146741364    | BAF62337.1      | glucosyltransferase-I                | Streptococcus orisuis                          | NUM 1001 (JCM14035) | gtfI       | Pig, oral              | 1466           | Dextran        |
| 153649       | AAA26896.1      | glucosyltransferase-I                | Streptococcus salivarius                       | ATCC 25975          | gtfJ       | Human, oral            | 1518           | Mutan          |
| 47531        | CAA77898.1      | glucosyltransferase-S                | Streptococcus salivarius                       | ATCC 25975          | gtfK       | Human, oral            | 1599           | Dextran        |
| 662379       | AAC41412.1      | glucosyltransferase                  | Streptococcus salivarius                       | ATCC 25975          | gtfL       | Human, oral            | 1449           | Mutan          |
| 662381       | AAC41413.1      | glucosyltransferase                  | Streptococcus salivarius                       | ATCC 25975          | gtfM       | Human, oral            | 1577           | Dextran        |
| 228476661    | ZP_04061337.1   | glucosyltransferase-SI               | Streptococcus salivarius                       | SK126               |            | Human, skin            | 1569           | N/F            |
| 325688181    | EGD30200.1      | glucosyltransferase-S                | Streptococcus sanguinis                        | SK72                |            | Human, oral            | 1575           | N/F            |
| 121725       | P27470.1        | glucosyltransferase-I                | Streptococcus sobrinus                         | 6715                | gtfI       | Human, oral            | 1592           | Mutan          |
| 62199787     | AAx76986.1      | glucosyltransferase-S2               | Streptococcus sobrinus                         | B13N                | gtfT       | N/F                    | 1506           | Dextran        |
| 22138845     | BAC07265.1      | glucosyltransferase-S1               | Streptococcus sobrinus                         | B13N                | gtfU       | N/F                    | 1554           | Dextran        |
| 940427       | BAA09792.1      | glucosyltransferase-I                | Streptococcus sobrinus                         | ATCC 33478 (SL1)    | gtfI       | Human, oral            | 1590           | Mutan          |
| 332638569    | ZP_08417432.1   | glycosyl hydrolase family 70 protein | Weissella cibaria                              | KACC 11862          |            | Kimchi                 | 1448           | N/F            |
